# Supplementary material for: Cooperative halogen bonds in V-shaped H3N·X1X2·X3Y (X1, X2, X3 = Cl and Br; Y = F, Cl and Br) complexes
Source: Royal Society of Chemistry journal article supplement (doi:10.1039/c6ra21018j), 2016-01-01
Supplement: c6ra21018j1.pdf [file c6ra21018j1.pdf]

## Supporting Information

### Cooperative Halogen Bonds in V-Shaped $\text{H}_3\text{N}\cdot\text{X}_1\text{X}_2\cdot\text{X}_3\text{Y}$ ( $\text{X}_1, \text{X}_2, \text{X}_3=\text{Cl}$ and $\text{Br}$ ; $\text{Y}=\text{F}, \text{Cl}$ and $\text{Br}$ ) Complexes

*Xing Yang, Chao-Xian Yan, Da-Gang Zhou, Fan Yang, Pan-Pan Zhou\**

*State Key Laboratory of Applied Organic Chemistry, Key Laboratory of Nonferrous Metal*

*Chemistry and Resources Utilization of Gansu Province, College of Chemistry and Chemical*

*Engineering, Lanzhou University, 222 South Tianshui Road, 730000, Lanzhou, P. R. China.*

*\* Fax: +86-931-8912582; Tel: +86 931 8912862; E-mail: zhoupp@lzu.edu.cn*

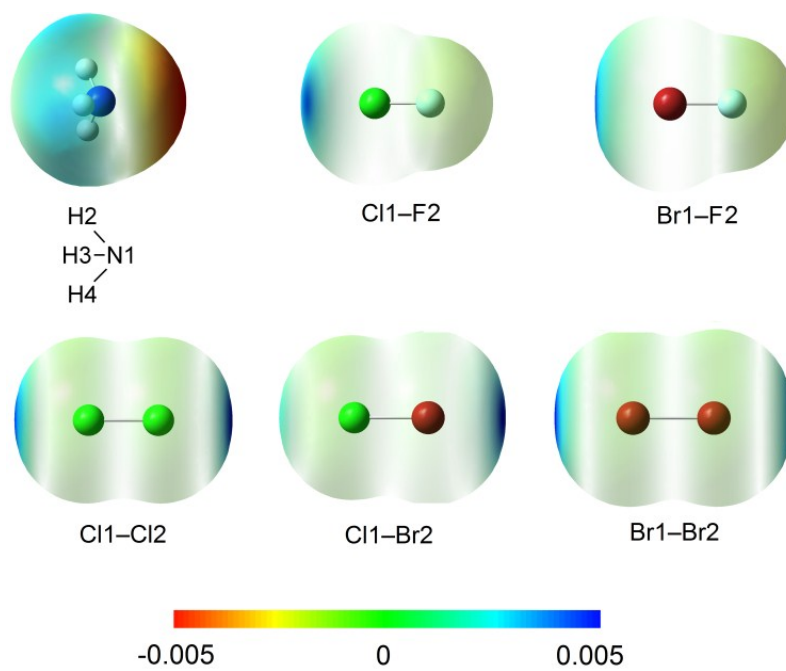

**Figure S1.** Optimized geometries for the six monomers ( $\text{NH}_3$ ,  $\text{FCl}$ ,  $\text{FBr}$ ,  $\text{Cl}_2$ ,  $\text{ClBr}$ ,  $\text{Br}_2$ ) and their MEPs mapped on the surface of molecular electron density (0.0004 a.u.). The values of the MEP are in the range from  $-0.005$  to  $0.005$  a.u.

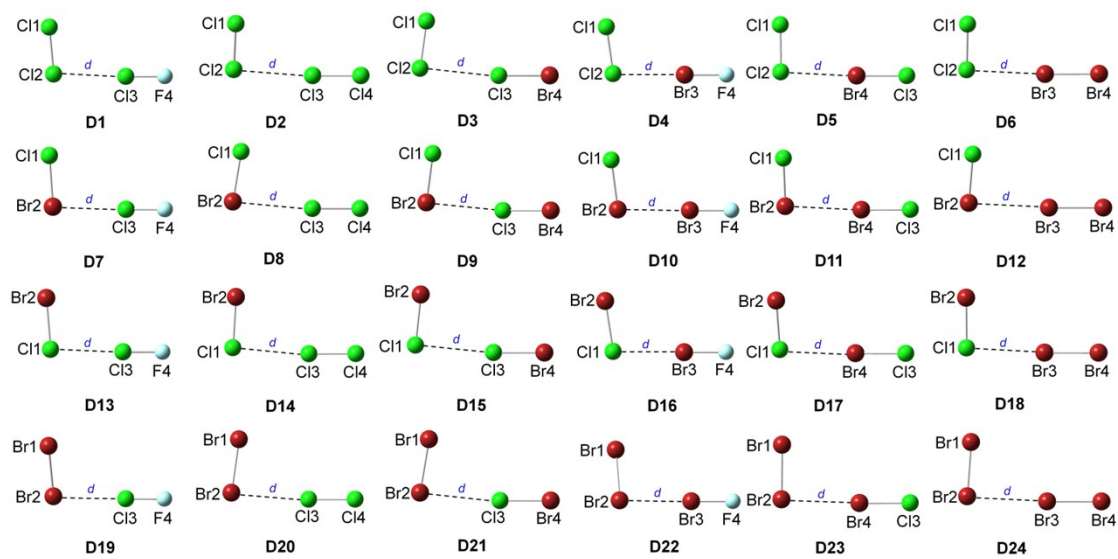

**Figure S2.** Optimized structures of dimers **D1-24**.

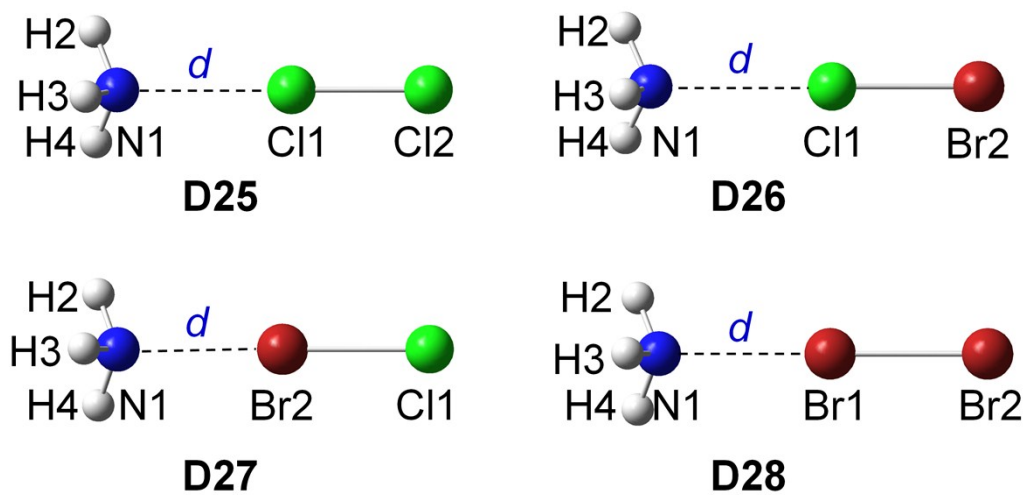

**Figure S3.** Optimized structures of dimers **D25-28**.

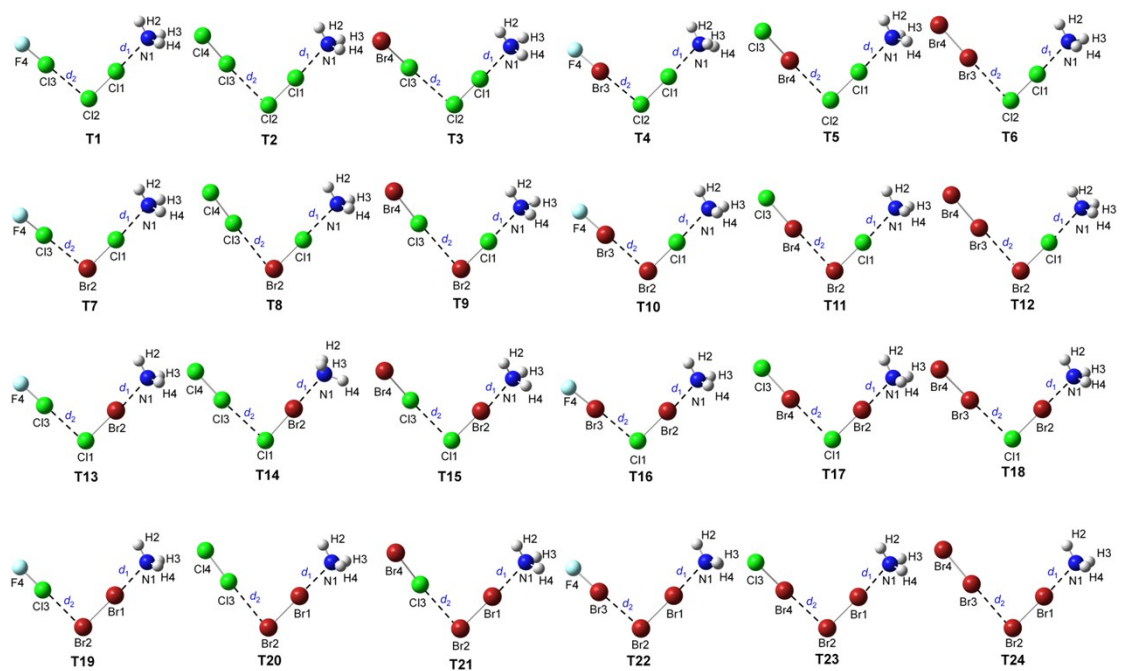

**Figure S4.** Optimized structures of trimers **T1-24**.

**Table S1** Structural parameters ( $R$ , in Å) and stretching vibrational frequencies ( $\nu$ , in  $\text{cm}^{-1}$ ) of six monomers at the MP2/aug-cc-pVTZ level.

| Monomer               | Bond    | $R$    | $\nu$  |
|-----------------------|---------|--------|--------|
| <b>NH<sub>3</sub></b> | N1-H2   | 1.0121 | 3503.1 |
| <b>ClF</b>            | Cl1-F2  | 1.6383 | 799.9  |
| <b>BrF</b>            | Br1-F2  | 1.7584 | 691.8  |
| <b>Cl<sub>2</sub></b> | Cl1-Cl2 | 1.9987 | 573.5  |
| <b>ClBr</b>           | Cl1-Br2 | 2.1383 | 460.6  |
| <b>Br<sub>2</sub></b> | Br1-Br2 | 2.2787 | 341.2  |

**Table S2** Structural parameters ( $R$ ,  $d$ , in Å), stretching vibrational frequencies ( $\nu$ , in  $\text{cm}^{-1}$ ) and interaction energies ( $\Delta E_{\text{int}}$ , in  $\text{kcal mol}^{-1}$ ) of dimers **D1-24** obtained at the MP2/aug-cc-pVTZ level without (non-CP) CP optimization.

| Complex    | Bond    | $R$    | $\nu$ | $d$    | $\Delta E_{\text{int}}$ |
|------------|---------|--------|-------|--------|-------------------------|
| <b>D1</b>  | Cl1-Cl2 | 1.9984 | 572.5 | 2.9940 | -2.64                   |
|            | Cl3-F4  | 1.6459 | 776.6 |        |                         |
| <b>D2</b>  | Cl1-Cl2 | 1.9986 | 572.8 | 3.2264 | -2.03                   |
|            | Cl3-Cl4 | 2.0025 | 565.9 |        |                         |
| <b>D3</b>  | Cl1-Cl2 | 1.9985 | 573.0 | 3.2680 | -2.05                   |
|            | Cl3-Br4 | 2.1411 | 456.1 |        |                         |
| <b>D4</b>  | Cl1-Cl2 | 1.9980 | 572.1 | 2.9535 | -4.02                   |
|            | Br3-F4  | 1.7690 | 668.0 |        |                         |
| <b>D5</b>  | Cl1-Cl2 | 1.9986 | 572.4 | 3.1777 | -3.00                   |
|            | Cl3-Br4 | 2.1454 | 451.5 |        |                         |
| <b>D6</b>  | Cl1-Cl2 | 1.9986 | 572.6 | 3.2341 | -2.91                   |
|            | Br3-Br4 | 2.2843 | 336.0 |        |                         |
| <b>D7</b>  | Cl1-Br2 | 2.1357 | 461.5 | 3.0125 | -3.35                   |
|            | Cl3-F4  | 1.6504 | 760.4 |        |                         |
| <b>D8</b>  | Cl1-Br2 | 2.1371 | 461.0 | 3.2703 | -2.48                   |
|            | Cl3-Cl4 | 2.0046 | 560.8 |        |                         |
| <b>D9</b>  | Cl1-Br2 | 2.1373 | 461.0 | 3.3130 | -2.50                   |
|            | Cl3-Br4 | 2.1428 | 453.0 |        |                         |
| <b>D10</b> | Cl1-Br2 | 2.1360 | 459.9 | 2.9774 | -5.07                   |
|            | Br3-F4  | 1.7753 | 652.8 |        |                         |
| <b>D11</b> | Cl1-Br2 | 2.1367 | 460.9 | 3.2146 | -3.66                   |
|            | Cl3-Br4 | 2.1494 | 445.3 |        |                         |
| <b>D12</b> | Cl1-Br2 | 2.1371 | 460.6 | 3.2742 | -3.53                   |
|            | Br3-Br4 | 2.2873 | 332.1 |        |                         |
| <b>D13</b> | Cl1-Br2 | 2.1389 | 459.6 | 2.9678 | -3.10                   |
|            | Cl3-F4  | 1.6470 | 773.5 |        |                         |
| <b>D14</b> | Cl1-Br2 | 2.1388 | 459.7 | 3.2010 | -2.42                   |
|            | Cl3-Cl4 | 2.0032 | 564.6 |        |                         |
| <b>D15</b> | Cl1-Br2 | 2.1385 | 459.9 | 3.2453 | -2.42                   |
|            | Cl3-Br4 | 2.1416 | 455.8 |        |                         |
| <b>D16</b> | Cl1-Br2 | 2.1395 | 458.6 | 2.9317 | -4.63                   |
|            | Br3-F4  | 1.7706 | 665.0 |        |                         |
| <b>D17</b> | Cl1-Br2 | 2.1391 | 459.3 | 3.1517 | -3.51                   |
|            | Cl3-Br4 | 2.1465 | 450.0 |        |                         |
| <b>D18</b> | Cl1-Br2 | 2.1390 | 459.3 | 3.2080 | -3.41                   |
|            | Br3-Br4 | 2.2852 | 335.1 |        |                         |
| <b>D19</b> | Br1-Br2 | 2.2774 | 341.3 | 2.9953 | -3.78                   |
|            | Cl3-F4  | 1.6518 | 756.3 |        |                         |

---

|            |         |        |       |        |       |
|------------|---------|--------|-------|--------|-------|
| <b>D20</b> | Br1-Br2 | 2.2782 | 341.1 | 3.2523 | -2.84 |
|            | Cl3-Cl4 | 2.0054 | 559.2 |        |       |
| <b>D21</b> | Br1-Br2 | 2.2781 | 341.1 | 3.2966 | -2.85 |
|            | Cl3-Br4 | 2.1434 | 452.0 |        |       |
| <b>D22</b> | Br1-Br2 | 2.2778 | 340.4 | 2.9661 | -5.63 |
|            | Br3-F4  | 1.7769 | 649.8 |        |       |
| <b>D23</b> | Br1-Br2 | 2.2779 | 341.0 | 3.1975 | -4.15 |
|            | Cl3-Br4 | 2.1504 | 444.0 |        |       |
| <b>D24</b> | Br1-Br2 | 2.2781 | 340.9 | 3.2545 | -4.01 |
|            | Br3-Br4 | 2.2885 | 330.9 |        |       |

---



**Table S3** Structural parameters ( $R$ ,  $d$ , in Å), stretching vibrational frequencies ( $\nu$ , in  $\text{cm}^{-1}$ ) and interaction energies ( $\Delta E_{\text{int}}$ ,  $\Delta E_{\text{int,CP}}$ , in  $\text{kcal mol}^{-1}$ ) of dimers **D25-28** without (Non-CP) and with CP optimizations at the MP2/aug-cc-pVTZ level.

| Complex    | Bond    | non-CP |        |        |                         | CP     |        |        |                                                  |
|------------|---------|--------|--------|--------|-------------------------|--------|--------|--------|--------------------------------------------------|
|            |         | $R$    | $\nu$  | $d$    | $\Delta E_{\text{int}}$ | $R$    | $\nu$  | $d$    | $\Delta E_{\text{int,CP}}(\delta_{\text{BSSE}})$ |
| <b>D25</b> | N1-H2   | 1.0123 | 3498.4 | 2.5907 | -5.48                   | 1.0124 | 3498.5 | 2.6333 | -4.93 (0.55)                                     |
|            | Cl1-Cl2 | 2.0335 | 505.8  |        |                         | 2.0295 | 513.2  |        |                                                  |
| <b>D26</b> | N1-H2   | 1.0124 | 3498.4 | 2.6776 | -4.53                   | 1.0124 | 3498.2 | 2.7332 | -3.86 (0.67)                                     |
|            | Cl1-Br2 | 2.1640 | 416.0  |        |                         | 2.1609 | 421.5  |        |                                                  |
| <b>D27</b> | N1-H2   | 1.0126 | 3493.3 | 2.4698 | -10.08                  | 1.0125 | 3496.0 | 2.5288 | -8.46 (1.62)                                     |
|            | Cl1-Br2 | 2.2026 | 398.9  |        |                         | 2.1933 | 400.5  |        |                                                  |
| <b>D28</b> | N1-H2   | 1.0125 | 3494.4 | 2.5385 | -8.60                   | 1.0126 | 3494.4 | 2.6103 | -6.89 (1.70)                                     |
|            | Br1-Br2 | 2.3322 | 294.0  |        |                         | 2.3236 | 299.1  |        |                                                  |

**Table S4** Structural parameters ( $R$ ,  $d_1$ ,  $d_2$ , in Å), stretching vibrational frequencies ( $\nu$ , in  $\text{cm}^{-1}$ ) and interaction energies ( $\Delta E_{\text{int}}$ , in  $\text{kcal mol}^{-1}$ ) of trimers **T1-24** without CP optimizations at the MP2/aug-cc-pVTZ level.

| Complex    | Bond    | $R$    | $\nu$  | $d_1$  | $d_2$  | $\Delta E_{\text{int}}$ |
|------------|---------|--------|--------|--------|--------|-------------------------|
| <b>T1</b>  | N1-H2   | 1.0126 | 3495.4 | 2.4627 | 2.8726 | -9.69                   |
|            | C11-Cl2 | 2.0533 | 468.6  |        |        |                         |
|            | Cl3-F4  | 1.6548 | 754.2  |        |        |                         |
| <b>T2</b>  | N1-H2   | 1.0125 | 3496.4 | 2.5225 | 3.1434 | -8.31                   |
|            | C11-Cl2 | 2.0438 | 486.1  |        |        |                         |
|            | Cl3-Cl4 | 2.0054 | 560.4  |        |        |                         |
| <b>T3</b>  | N1-H2   | 1.0125 | 3496.7 | 2.5354 | 3.1968 | -8.14                   |
|            | C11-Cl2 | 2.0413 | 490.5  |        |        |                         |
|            | Cl3-Br4 | 2.1435 | 452.6  |        |        |                         |
| <b>T4</b>  | N1-H2   | 1.0126 | 3494.5 | 2.3900 | 2.8209 | -12.00                  |
|            | C11-Cl2 | 2.0696 | 443.8  |        |        |                         |
|            | Br3-F4  | 1.7827 | 643.4  |        |        |                         |
| <b>T5</b>  | N1-H2   | 1.0125 | 3495.7 | 2.4662 | 3.0599 | -9.97                   |
|            | C11-Cl2 | 2.0532 | 469.5  |        |        |                         |
|            | Cl3-Br4 | 2.1532 | 441.9  |        |        |                         |
| <b>T6</b>  | N1-H2   | 1.0125 | 3496.0 | 2.4863 | 3.1260 | -9.64                   |
|            | C11-Cl2 | 2.0493 | 475.8  |        |        |                         |
|            | Br3-Br4 | 2.2900 | 330.5  |        |        |                         |
| <b>T7</b>  | N1-H2   | 1.0126 | 3495.7 | 2.5541 | 2.9208 | -9.28                   |
|            | C11-Br2 | 2.1759 | 390.8  |        |        |                         |
|            | Cl3-F4  | 1.6602 | 734.2  |        |        |                         |
| <b>T8</b>  | N1-H2   | 1.0126 | 3496.3 | 2.6120 | 3.2052 | -7.71                   |
|            | C11-Br2 | 2.1699 | 403.6  |        |        |                         |
|            | Cl3-Cl4 | 2.0084 | 553.3  |        |        |                         |
| <b>T9</b>  | N1-H2   | 1.0125 | 3496.6 | 2.6237 | 3.2574 | -7.57                   |
|            | C11-Br2 | 2.1687 | 406.0  |        |        |                         |
|            | Cl3-Br4 | 2.1453 | 448.4  |        |        |                         |
| <b>T10</b> | N1-H2   | 1.0126 | 3495.0 | 2.4905 | 2.8878 | -11.77                  |
|            | C11-Br2 | 2.1859 | 373.7  |        |        |                         |
|            | Br3-F4  | 1.7886 | 628.2  |        |        |                         |

|            |         |        |        |        |        |        |
|------------|---------|--------|--------|--------|--------|--------|
| <b>T11</b> | N1-H2   | 1.0127 | 3494.7 | 2.5595 | 3.1237 | -9.51  |
|            | Cl1-Br2 | 2.1762 | 391.4  |        |        |        |
|            | Cl3-Br4 | 2.1577 | 435.1  |        |        |        |
| <b>T12</b> | N1-H2   | 1.0125 | 3496.3 | 2.5761 | 3.1877 | -9.17  |
|            | Cl1-Br2 | 2.1742 | 395.5  |        |        |        |
|            | Br3-Br4 | 2.2939 | 325.5  |        |        |        |
| <b>T13</b> | N1-H2   | 1.0129 | 3489.7 | 2.3716 | 2.7995 | -15.66 |
|            | Cl1-Br2 | 2.2297 | 373.6  |        |        |        |
|            | Cl3-F4  | 1.6622 | 734.8  |        |        |        |
| <b>T14</b> | N1-H2   | 1.0127 | 552.3  | 2.4147 | 3.0725 | -13.77 |
|            | Cl1-Br2 | 2.2169 | 381.5  |        |        |        |
|            | Cl3-Cl4 | 2.0097 | 3491.8 |        |        |        |
| <b>T15</b> | N1-H2   | 1.0127 | 3492.0 | 2.4243 | 3.1295 | -13.49 |
|            | Cl1-Br2 | 2.2142 | 383.3  |        |        |        |
|            | Cl3-Br4 | 2.1460 | 448.1  |        |        |        |
| <b>T16</b> | N1-H2   | 1.0132 | 3486.9 | 2.3294 | 2.7660 | -18.53 |
|            | Cl1-Br2 | 2.2452 | 365.5  |        |        |        |
|            | Br3-F4  | 1.7909 | 628.8  |        |        |        |
| <b>T17</b> | N1-H2   | 1.0130 | 3488.7 | 2.3735 | 2.9839 | -15.95 |
|            | Cl1-Br2 | 2.2298 | 372.9  |        |        |        |
|            | Cl3-Br4 | 2.1602 | 433.9  |        |        |        |
| <b>T18</b> | N1-H2   | 1.0129 | 3490.4 | 2.3864 | 3.0449 | -15.47 |
|            | Cl1-Br2 | 2.2256 | 375.6  |        |        |        |
|            | Br3-Br4 | 2.2958 | 324.7  |        |        |        |
| <b>T19</b> | N1-H2   | 1.0129 | 3490.3 | 2.4309 | 2.8594 | -14.65 |
|            | Br1-Br2 | 2.3549 | 279.9  |        |        |        |
|            | Cl3-F4  | 1.6688 | 711.2  |        |        |        |
| <b>T20</b> | N1-H2   | 1.0127 | 3492.1 | 2.4778 | 3.1423 | -12.59 |
|            | Br1-Br2 | 2.3442 | 285.6  |        |        |        |
|            | Cl3-Cl4 | 2.0124 | 544.7  |        |        |        |
| <b>T21</b> | N1-H2   | 1.0127 | 3492.7 | 2.4878 | 3.1960 | -12.34 |
|            | Br1-Br2 | 2.3420 | 286.9  |        |        |        |
|            | Cl3-Br4 | 2.1485 | 442.3  |        |        |        |
| <b>T22</b> | N1-H2   | 1.0130 | 3488.5 | 2.3897 | 2.8437 | -17.65 |
|            | Br1-Br2 | 2.3664 | 275.0  |        |        |        |

---

|            |         |        |        |        |        |        |
|------------|---------|--------|--------|--------|--------|--------|
|            | Br3-F4  | 1.7977 | 612.0  |        |        |        |
| <b>T23</b> | N1-H2   | 1.0128 | 3490.6 | 2.4336 | 3.0552 | -14.90 |
|            | Br1-Br2 | 2.3550 | 279.6  |        |        |        |
|            | Cl3-Br4 | 2.1661 | 424.5  |        |        |        |
| <b>T24</b> | N1-H2   | 1.0128 | 3491.0 | 2.4468 | 3.1177 | -14.41 |
|            | Br1-Br2 | 2.3517 | 281.2  |        |        |        |
|            | Br3-Br4 | 2.3007 | 318.6  |        |        |        |

---

**Table S5** Sum(*d*) and  $\Delta d_D$  of dimers **D1-28**.<sup>a</sup>

| Complex    | Sum( <i>d</i> ) | $\Delta d_D$ |
|------------|-----------------|--------------|
| <b>D1</b>  | 3.60            | 0.5629       |
| <b>D2</b>  | 3.60            | 0.3274       |
| <b>D3</b>  | 3.60            | 0.2773       |
| <b>D4</b>  | 3.75            | 0.7317       |
| <b>D5</b>  | 3.75            | 0.4993       |
| <b>D6</b>  | 3.75            | 0.4366       |
| <b>D7</b>  | 3.75            | 0.6471       |
| <b>D8</b>  | 3.75            | 0.3881       |
| <b>D9</b>  | 3.75            | 0.3385       |
| <b>D10</b> | 3.90            | 0.8316       |
| <b>D11</b> | 3.90            | 0.5792       |
| <b>D12</b> | 3.90            | 0.5147       |
| <b>D13</b> | 3.60            | 0.5862       |
| <b>D14</b> | 3.60            | 0.3493       |
| <b>D15</b> | 3.60            | 0.2993       |
| <b>D16</b> | 3.75            | 0.7531       |
| <b>D17</b> | 3.75            | 0.5253       |
| <b>D18</b> | 3.75            | 0.4611       |
| <b>D19</b> | 3.75            | 0.6647       |
| <b>D20</b> | 3.75            | 0.4069       |
| <b>D21</b> | 3.75            | 0.3562       |
| <b>D22</b> | 3.90            | 0.8446       |
| <b>D23</b> | 3.90            | 0.6001       |
| <b>D24</b> | 3.90            | 0.5364       |
| <b>D25</b> | 3.30            | 0.6667       |
| <b>D26</b> | 3.30            | 0.5668       |
| <b>D27</b> | 3.45            | 0.9212       |
| <b>D28</b> | 3.45            | 0.8397       |

<sup>a</sup> Sum(*d*) is the sum of the van der Waals radii involved in halogen bonding, and  $\Delta d_D$  is the difference between Sum(*d*) and the halogen bonding distance.

**Table S6** Sum( $d$ ) and the corresponding  $\Delta d_T$  of the halogen bonding in trimers **T1-24**.<sup>a</sup>

| Complex    | Sum( $d_1$ ) | $\Delta d_{1,T}$ | Sum( $d_2$ ) | $\Delta d_{2,T}$ |
|------------|--------------|------------------|--------------|------------------|
| <b>T1</b>  | 3.30         | -0.7854          | 3.60         | 0.6806           |
| <b>T2</b>  | 3.30         | -0.7287          | 3.60         | 0.4094           |
| <b>T3</b>  | 3.30         | -0.7160          | 3.60         | 0.3486           |
| <b>T4</b>  | 3.30         | -0.8482          | 3.75         | 0.8636           |
| <b>T5</b>  | 3.30         | -0.7757          | 3.75         | 0.6152           |
| <b>T6</b>  | 3.30         | -0.7570          | 3.75         | 0.5441           |
| <b>T7</b>  | 3.30         | -0.6787          | 3.75         | 0.7361           |
| <b>T8</b>  | 3.30         | -0.6239          | 3.75         | 0.4499           |
| <b>T9</b>  | 3.30         | -0.6149          | 3.75         | 0.3981           |
| <b>T10</b> | 3.30         | -0.7334          | 3.90         | 0.9266           |
| <b>T11</b> | 3.30         | -0.6685          | 3.90         | 0.6701           |
| <b>T12</b> | 3.30         | -0.6531          | 3.90         | 0.5992           |
| <b>T13</b> | 3.45         | -1.0183          | 3.60         | 0.7475           |
| <b>T14</b> | 3.45         | -0.9759          | 3.60         | 0.4750           |
| <b>T15</b> | 3.45         | -0.9652          | 3.60         | 0.4117           |
| <b>T16</b> | 3.45         | -1.0611          | 3.75         | 0.9221           |
| <b>T17</b> | 3.45         | -1.0110          | 3.75         | 0.6908           |
| <b>T18</b> | 3.45         | -0.9996          | 3.75         | 0.6214           |
| <b>T19</b> | 3.45         | -0.9433          | 3.75         | 0.8004           |
| <b>T20</b> | 3.45         | -0.8964          | 3.75         | 0.5102           |
| <b>T21</b> | 3.45         | -0.8854          | 3.75         | 0.4527           |
| <b>T22</b> | 3.45         | -0.9873          | 3.90         | 0.9744           |
| <b>T23</b> | 3.45         | -0.9378          | 3.90         | 0.7384           |
| <b>T24</b> | 3.45         | -0.9233          | 3.90         | 0.6687           |

<sup>a</sup> Sum( $d_1$ ) and Sum( $d_2$ ) are the sum of the van der Waals radii involved in halogen bonding corresponding with  $d_1$  and  $d_2$ , respectively.  $\Delta d_T$  is the difference between Sum( $d$ ) and the binding distance ( $d_1$  or  $d_2$ ).

**Table S7** Topological parameters at the BCPs for dimers **D1-28** (all units are in a.u.).

| Complex    | Binding   | $\rho$ | $\nabla^2\rho$ | $V$     | $G$    | $H$     |
|------------|-----------|--------|----------------|---------|--------|---------|
| <b>D1</b>  | Cl2...Cl3 | 0.0135 | 0.0582         | -0.0101 | 0.0123 | 0.0022  |
| <b>D2</b>  | Cl2...Cl3 | 0.0086 | 0.0377         | -0.0054 | 0.0074 | 0.0020  |
| <b>D3</b>  | Cl2...Cl3 | 0.0080 | 0.0345         | -0.0048 | 0.0067 | 0.0019  |
| <b>D4</b>  | Cl2...Br3 | 0.0170 | 0.0633         | -0.0130 | 0.0144 | 0.0014  |
| <b>D5</b>  | Cl2...Br4 | 0.0110 | 0.0427         | -0.0072 | 0.0089 | 0.0017  |
| <b>D6</b>  | Cl2...Br3 | 0.0099 | 0.0384         | -0.0062 | 0.0079 | 0.0017  |
| <b>D7</b>  | Br2...Cl3 | 0.0152 | 0.0562         | -0.0111 | 0.0126 | 0.0015  |
| <b>D8</b>  | Br2...Cl3 | 0.0092 | 0.0361         | -0.0056 | 0.0073 | 0.0017  |
| <b>D9</b>  | Br2...Cl3 | 0.0085 | 0.0331         | -0.0050 | 0.0066 | 0.0016  |
| <b>D10</b> | Br2...Br3 | 0.0197 | 0.0612         | -0.0146 | 0.0150 | 0.0003  |
| <b>D11</b> | Br2...Br4 | 0.0123 | 0.0414         | -0.0079 | 0.0091 | 0.0012  |
| <b>D12</b> | Br2...Br3 | 0.0110 | 0.0374         | -0.0068 | 0.0081 | 0.0013  |
| <b>D13</b> | Cl1...Cl3 | 0.0143 | 0.0606         | -0.0108 | 0.0130 | 0.0022  |
| <b>D14</b> | Cl1...Cl3 | 0.0091 | 0.0395         | -0.0057 | 0.0078 | 0.0021  |
| <b>D15</b> | Cl1...Cl3 | 0.0084 | 0.0361         | -0.0051 | 0.0071 | 0.0020  |
| <b>D16</b> | Cl1...Br3 | 0.0179 | 0.0654         | -0.0137 | 0.0150 | 0.0013  |
| <b>D17</b> | Cl1...Br4 | 0.0117 | 0.0447         | -0.0077 | 0.0094 | 0.0017  |
| <b>D18</b> | Cl1...Br3 | 0.0105 | 0.0401         | -0.0066 | 0.0083 | 0.0017  |
| <b>D19</b> | Br2...Cl3 | 0.0158 | 0.0577         | -0.0116 | 0.0130 | 0.0014  |
| <b>D20</b> | Br2...Cl3 | 0.0096 | 0.0374         | -0.0059 | 0.0076 | 0.0017  |
| <b>D21</b> | Br2...Cl3 | 0.0089 | 0.0343         | -0.0053 | 0.0069 | 0.0016  |
| <b>D22</b> | Br2...Br3 | 0.0202 | 0.0620         | -0.0150 | 0.0153 | 0.0002  |
| <b>D23</b> | Br2...Br4 | 0.0128 | 0.0428         | -0.0083 | 0.0095 | 0.0012  |
| <b>D24</b> | Br2...Br3 | 0.0115 | 0.0387         | -0.0071 | 0.0084 | 0.0013  |
| <b>D25</b> | N1...Cl1  | 0.0258 | 0.0960         | -0.0209 | 0.0225 | 0.0015  |
| <b>D26</b> | N1...Cl1  | 0.0212 | 0.0812         | -0.0160 | 0.0181 | 0.0022  |
| <b>D27</b> | N1...Br2  | 0.0376 | 0.1099         | -0.0324 | 0.0299 | -0.0024 |
| <b>D28</b> | N1...Br1  | 0.0320 | 0.0994         | -0.0260 | 0.0254 | -0.0006 |
